CORRECTION

# Correction: Schip1 Is a Novel Podocyte Foot Process Protein that Mediates Actin Cytoskeleton Rearrangements and Forms a Complex with Nherf2 and Ezrin

Ljubica Perisic, Patricia Q. Rodriguez, Kjell Hultenby, Ying Sun, Mark Lal, Christer Betsholtz, Mathias Uhlén, Annika Wernerson, Ulf Hedin, Timo Pikkarainen, Karl Tryggvason, Jaakko Patrakka

There are errors in the affiliations for authors Patricia Q. Rodriguez and Jaakko Patrakka. Both authors are affiliated with #1, Division of Matrix Biology, Department of Medical Biochemistry and Biophysics, Karolinska Institute, Stockholm, Sweden, and #2 KI/AZ Integrated CardioMetabolic Center, Department of Medicine, Karolinska Institutet at Karolinska University Hospital Huddinge, Stockholm, Sweden.

## Reference

1. Perisic L, Rodriguez PQ, Hultenby K, Sun Y, Lal M, Betsholtz C, et al. (2015) Schip1 Is a Novel Podocyte Foot Process Protein that Mediates Actin Cytoskeleton Rearrangements and Forms a Complex with Nherf2 and Ezrin. PLoS ONE 10(3): e0122067. doi: [10.1371/journal.pone.0122067](https://doi.org/10.1371/journal.pone.0122067) PMID: [25807495](https://pubmed.ncbi.nlm.nih.gov/25807495/)

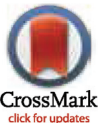

## OPEN ACCESS

**Citation:** Perisic L, Rodriguez PQ, Hultenby K, Sun Y, Lal M, Betsholtz C, et al. (2015) Correction: Schip1 Is a Novel Podocyte Foot Process Protein that Mediates Actin Cytoskeleton Rearrangements and Forms a Complex with Nherf2 and Ezrin. PLoS ONE 10(5): e0126079. doi:10.1371/journal.pone.0126079

**Published:** May 12, 2015

**Copyright:** © 2015 Perisic et al. This is an open access article distributed under the terms of the [Creative Commons Attribution License](https://creativecommons.org/licenses/by/4.0/), which permits unrestricted use, distribution, and reproduction in any medium, provided the original author and source are credited.
